# Supplementary material for: Membrane manufacture for peptide separation
Source: Royal Society of Chemistry journal article supplement (doi:10.1039/c6gc01259k), 2016-01-01
Supplement: c6gc01259k1.pdf [file c6gc01259k1.pdf]

Supporting Information

## Green membrane manufacture for peptide separations

*DooLi Kim<sup>a</sup>, Octavio R. Salazar<sup>a</sup> and Suzana P. Nunes<sup>\*a</sup>*

<sup>a</sup>King Abdullah University of Science and Technology (KAUST), Biological and Environmental Science and Engineering Division (BESE), Thuwal, 23955-6900, Saudi Arabia

Table 1S. Hansen solubility parameters ( $\delta$ ) for PES, PSU, and different solvents;  $\delta_d$ ,  $\delta_p$  and  $\delta_h$  are van der Waals, polarity, and hydrogen bond contributions to  $\delta$ .

|                        | $\delta_d$ | $\delta_p$ | $\delta_H$ | $\delta$ (MPa <sup>1/2</sup> ) |
|------------------------|------------|------------|------------|--------------------------------|
| PSU <sup>b</sup>       | 20         | 8          | 8          | 23                             |
| PES <sup>b</sup>       | 19         | 11         | 8          | 23                             |
| [EMIM]DEP <sup>a</sup> | 20         | 13         | 15         | 28                             |
| [EMIM]OAc <sup>a</sup> | 22         | 16         | 17         | 32                             |
| NMP <sup>b</sup>       | 18         | 12         | 7          | 23                             |
| DMF <sup>b</sup>       | 17         | 14         | 11         | 25                             |
| DMAc <sup>b</sup>      | 17         | 12         | 10         | 23                             |
| Water <sup>b</sup>     | 16         | 16         | 42         | 48                             |

<sup>a</sup>Calculated with HSPiP, <sup>b</sup>From a reference. <sup>31</sup>

Table 2S. Rejections of PEG (and PEO) of different molecular weights, measured for PES membranes cast from solutions in [EMIM]DEP with different polymer concentrations and from 16 wt% PES solutions in NMP, DMAc and DMF; MWCO estimated from the measuring data.

| Molecular weight<br>(kg mol <sup>-1</sup> ) | Solute rejection (%) |                     |                     |                     |               |                |               |
|---------------------------------------------|----------------------|---------------------|---------------------|---------------------|---------------|----------------|---------------|
|                                             | 8 wt%<br>[EMIM]DEP   | 12 wt%<br>[EMIM]DEP | 14 wt%<br>[EMIM]DEP | 16 wt%<br>[EMIM]DEP | 16 wt%<br>NMP | 16 wt%<br>DMAc | 16 wt%<br>DMF |
| 600                                         | 100                  | 100                 | 100                 | 100                 | 100           | 100            | 100           |
| 100                                         | 100                  | 100                 | 100                 | 100                 | 100           | 100            | 100           |
| 35                                          | 99± 0.2              | 100                 | 100                 | 100                 | 97            | 97± 0.1        | 94± 0.2       |
| 10                                          | 48± 0.4              | 100                 | 100                 | 100                 | 46± 0.2       | 67± 0.3        | 33± 0.3       |
| 6                                           | 16± 0.1              | 100                 | 100                 | 100                 | 25± 0.1       | 62± 0.1        | 24± 0.4       |
| 1.5                                         | 4± 0.5               | 44± 0.4             | 100                 | 100                 | 9± 0.4        | 58± 0.1        | 13± 0.4       |
| 0.3                                         | 1± 0.2               | 16± 0.1             | 40± 0.1             | 52.9                | 5± 0.3        | 59± 0.3        | 10± 0.2       |
| MWCO<br>(kg mol <sup>-1</sup> )             | 30                   | 5                   | 1.3                 | 1.25                | 31            | 29             | 33            |

Table 3S. Water permeance and MWC0 of PES membranes reported in the literature.

| Composition                            | Membrane type | Water permeance (L m <sup>-2</sup> h <sup>-1</sup> bar <sup>-1</sup> ) | MWC0 (kg mol <sup>-1</sup> ) | References |
|----------------------------------------|---------------|------------------------------------------------------------------------|------------------------------|------------|
| 8 % PES/[EMIM]DEP                      | FS            | 140                                                                    | 30                           | This study |
| 12 % PES/[EMIM]DEP                     | FS            | 65                                                                     | 5                            | This study |
| 14 % PES/[EMIM]DEP                     | FS            | 25                                                                     | 1.3                          | This study |
| 16 % PES/[EMIM]DEP                     | FS            | 20                                                                     | 1.25                         | This study |
| 18 % PES/f-MWCNT/PVP/DMF               | FS            | 24                                                                     | 35                           | 48         |
| 18 % PES/15 % Methanol/67 % NMP        | HF            | 187                                                                    | 10                           | 58         |
| PES/PEG/NMP                            | HF            | 28                                                                     | 45                           | 45         |
| 32 % PES/DMF                           | FS            | 9.4                                                                    | 1.9                          | 46         |
| 30 % PES/NMP                           | FS            | 22.2                                                                   | 2.1                          |            |
| NFPES10 (Nadir, Germany)               | FS            | 15.4                                                                   | 1.2                          |            |
| N30F (Nadir, Germany)                  | FS            | 3.8                                                                    | 0.7                          |            |
| 20 % PES/DMF                           | FS            | 5                                                                      | 35                           | 47         |
| 20 % PEG/PEG/DMF                       | FS            | 25                                                                     | 65                           |            |
| NTR7450 (modified PES, Nitto-Denko)    | FS            | 5.7                                                                    | 0.7                          | 49         |
| 15 % PES/DMF                           | FS            | 9                                                                      | 2                            | 50         |
| 15 % PES/NMP                           | FS            | 1.7                                                                    | 35                           |            |
| 17.5 % PES/82.5 % NMP                  | FS            | 2.6                                                                    | > 69                         | 51         |
| 17.5 % PES/82.5 % DMSO                 | FS            | 5.7                                                                    | 45                           |            |
| 17.5 % PES/82.5 % DMF                  | FS            | 3.6                                                                    | 35                           |            |
| 15 % PES/85 % NMP                      | FS            | 5.6                                                                    | 45                           |            |
| 15 % PES/85 % DMSO                     | FS            | 11.9                                                                   | 20                           |            |
| 15 % PES/85 % DMF                      | FS            | 7.7                                                                    | 35                           |            |
| PES (HFK-131, Koch)                    | FS            | 53                                                                     | 10                           | 53 54      |
| 16 % PES/2 % PVP/82 % DMAc             | FS            | 74                                                                     | 80.5                         | 52         |
| 16 % PES/2 % PVP/10 % AA/72 % DMAc     | FS            | 44                                                                     | 35.9                         |            |
| 16 % PES/2 % PVP/10 % HEMA/72 % DMAc   | FS            | 59                                                                     | 34.1                         |            |
| 18 % PES/NMP                           | FS            | 850                                                                    | 600                          | 55         |
| 18 % PES/0.03 % ZrO <sub>2</sub> /NMP  | FS            | 1580                                                                   | 600                          |            |
| PES/PVP (HydraCap 60, LD Hydranautics) | HF            | 600                                                                    | 150                          | 56         |
| PES/PVP/DMAc                           | FS            | 350                                                                    | 120                          | 57         |
| PES/TiO <sub>2</sub> /PVP/DMAc         | FS            | 450                                                                    | 250                          |            |

\* FS: flat sheet, HF: hollow fiber

PES/[EMIM]DEP

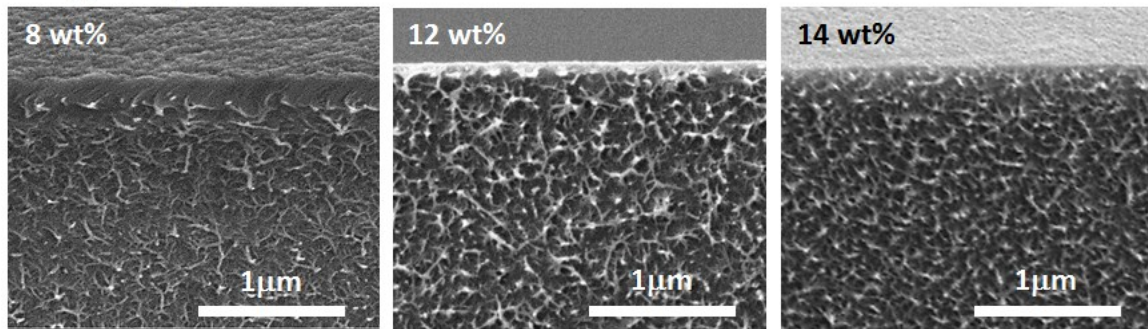

Figure 1S. FESEM images of membranes cross sections, cast from PES/[EMIM]DEP solutions with the following polymer concentrations: 8, 12 and 14 wt%.

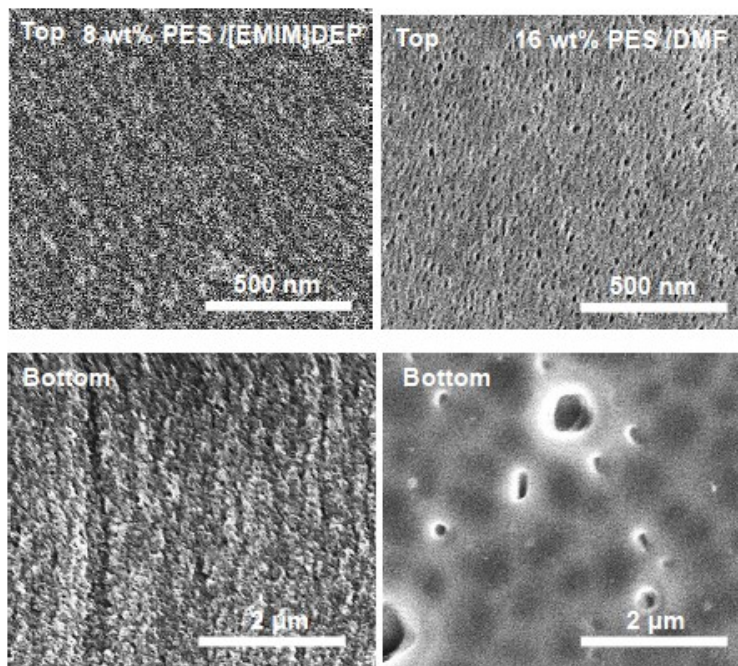

Figure 2S. FESEM images of membranes surfaces (top and bottom), cast from 8 wt% PES/[EMIM]DEP and 16 wt % PES/DMF solutions.
